# Supplementary material for: Estimating the number of people who inject drugs in Australia
Source: Springer Nature journal article supplement (doi:10.1186/s12889-017-4785-7), 2017-09-29
Supplement: MOESM1 [file 15094926]

**Supplementary table 1: Sex and age distributions of people who inject drugs observed in routinely collected and survey data, 2014, and summary proportions obtained by random effects meta-analysis**

| Sub-population     | Opioid substitution therapy <sup>1</sup> |                     | Drug-related deaths <sup>2</sup> |                     | Australian Needle and Syringe Program Survey <sup>3</sup> |                     | Illicit Drug Reporting System <sup>4</sup> |                     | Summary proportion (95% CI)        |
|--------------------|------------------------------------------|---------------------|----------------------------------|---------------------|-----------------------------------------------------------|---------------------|--------------------------------------------|---------------------|------------------------------------|
| Age group in years | N=48,088                                 |                     | N=846                            |                     | N=2,363                                                   |                     | N=896                                      |                     |                                    |
|                    | n                                        | Proportion (95% CI) | n                                | Proportion (95% CI) | n                                                         | Proportion (95% CI) | n                                          | Proportion (95% CI) |                                    |
| 15-24              | 1,191                                    | 0.02 (0.02, 0.03)   | 35                               | 0.04 (0.03, 0.06)   | 142                                                       | 0.06 (0.05, 0.07)   | 29                                         | 0.03 (0.02, 0.05)   | 0.04 (0.02, 0.06)                  |
| 25-34              | 12,189                                   | 0.25 (0.25, 0.26)   | 173                              | 0.20 (0.18, 0.23)   | 591                                                       | 0.25 (0.23, 0.27)   | 207                                        | 0.23 (0.20, 0.26)   | 0.24 (0.22, 0.26)                  |
| 35-44              | 18,403                                   | 0.38 (0.38, 0.39)   | 295                              | 0.35 (0.32, 0.38)   | 914                                                       | 0.39 (0.37, 0.41)   | 353                                        | 0.39 (0.37, 0.39)   | 0.38 (0.37, 0.39)                  |
| 45-54              | 11,717                                   | 0.26 (0.24, 0.29)   | 223                              | 0.26 (0.24, 0.29)   | 569                                                       | 0.24 (0.22, 0.26)   | 241                                        | 0.27 (0.24, 0.30)   | 0.25 (0.24, 0.26)                  |
| 55-64              | 4,588                                    | 0.10 (0.09, 0.10)   | 120                              | 0.14 (0.12, 0.17)   | 147                                                       | 0.06 (0.05, 0.07)   | 66                                         | 0.07 (0.06, 0.09)   | 0.09 (0.07, 0.12)                  |
| <b>Sex</b>         | <b>N=48,269</b>                          |                     | <b>N=846</b>                     |                     | <b>N=2,360</b>                                            |                     | <b>N=893</b>                               |                     | <b>Summary proportion (95% CI)</b> |
|                    | n                                        | Proportion (95% CI) | n                                | Proportion (95% CI) | n                                                         | Proportion (95% CI) | n                                          | Proportion (95% CI) |                                    |
| Female             | 16,866                                   | 0.35 (0.35, 0.35)   | 259                              | 0.31 (0.28, 0.34)   | 725                                                       | 0.31 (0.29, 0.33)   | 275                                        | 0.31 (0.28, 0.34)   | 0.32 (0.29, 0.35)                  |
| Male               | 31,403                                   | 0.65 (0.65, 0.65)   | 587                              | 0.69 (0.66, 0.72)   | 1,635                                                     | 0.69 (0.67, 0.71)   | 618                                        | 0.69 (0.65, 0.71)   | 0.68 (0.65, 0.71)                  |

<sup>1</sup>AIHW. National Opioid Pharmacotherapy Statistical Annual Data (NOPSAD) Collection. Canberra: Australian Institute of Health and Welfare, 2015. N varies between age group and sex distribution due to missing data

<sup>2</sup>Australian Bureau of Statistics customised report

<sup>3</sup>Iversen J, Maher L. Australian NSP Survey 20 Year National Data Report 1995-2014. Sydney: Kirby Institute, UNSW Sydney, 2015. N varies between age group and sex distribution due to missing data

<sup>4</sup>Stafford J, Burns L. Australian Drug Trends 2014: Findings from the Illicit Drug Reporting System. Sydney: National Drug and Alcohol Research Centre, UNSW Sydney, 2015. N varies between age group and sex distribution due to missing data
